# Supplementary material for: Microbial communities on fish eggs from Acanthopagrus schlegelii and Halichoeres nigrescens at the XuWen coral reef in the Gulf of Tonkin
Source: PeerJ. 2020 Feb 7;8:e8517. doi: 10.7717/peerj.8517 (PMC7008816; doi:10.7717/peerj.8517)
Supplement: Supplemental Information 1 [file peerj-08-8517-s002.xls]

## Sheet: Sheet2
Haplotype	Sample name	Best match species	Genbank number	Similiarity%	Distance to the best match species%	Nearest species	Genbank number	Similiarity%	Distance to the nearest species%
Hap_1	GDYH2415	Acanthopagrus schlegeli	KX083974	100	0	Acanthopagrus sivicolus	KJ012277	100	0
Hap_1	GDYH2416	Acanthopagrus schlegeli
Hap_1	GDYH2417	Acanthopagrus schlegeli
Hap_1	GDYH2418	Acanthopagrus schlegeli
Hap_1	GDYH2419	Acanthopagrus schlegeli
Hap_1	GDYH2421	Acanthopagrus schlegeli
Hap_1	GDYH2422	Acanthopagrus schlegeli
Hap_1	GDYH2424	Acanthopagrus schlegeli
Hap_1	GDYH2423	Acanthopagrus schlegeli
Hap_2	GDYH2420	Acanthopagrus schlegeli	JQ738447	100	0.17	Acanthopagrus sivicolus	KJ012275	99.85	0.17
Hap_3	GDYH2454	Halichoeres nigrescens	KY371578	99.84	0	Halichoeres timorensis	KF422721	91.41	5.14
Hap_3	GDYH2552	Halichoeres nigrescens
Hap_3	GDYH2557	Halichoeres nigrescens
Hap_3	GDYH2561	Halichoeres nigrescens
Hap_3	GDYH2565	Halichoeres nigrescens
Hap_3	GDYH2572	Halichoeres nigrescens
Hap_3	GDYH2580	Halichoeres nigrescens
